# Supplementary material for: The first case of novel variants of the FSHR mutation causing primary amenorrhea in 2 siblings in Korea
Source: PubMed Central journal article supplement — Ann Pediatr Endocrinol Metab. 2022 Jan 18;28(1):54–60. doi: 10.6065/apem.2142116.058 (PMC10073021; doi:10.6065/apem.2142116.058), 2022-01-18
Supplement: apem-2142116-058-suppl.pdf [file apem-2142116-058-suppl.pdf]

### $\Delta$ Vibrational entropy energy between wild-type and p.V455G mutant

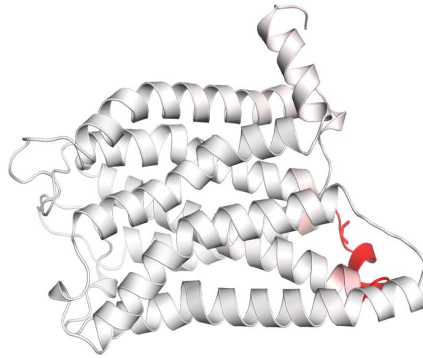

$\Delta\Delta S_{vib}$  ENCoM: 0.501 kcal/mol/K (Increase of molecule flexibility)

**Supplementary Fig. 1.** Visual representation of the  $\Delta$  entropy energy between the wild-type and p.V455G variant in which the amino acids were colored according to the vibrational entropy change upon mutation. Results from other predictive tools (NMA-based and other structure-based approaches) are also displayed to predict the mutation effect using the Dynamut web server with the normal mode analysis function (<http://biosig.unimelb.edu.au/dynamut/>). Red represents the gain in flexibility.
